# Supplementary material for: Low expression of SerpinB2 is associated with reduced survival in lung adenocarcinomas
Source: PubMed Central journal article supplement (PMC5710879; doi:10.18632/oncotarget.21456), 2017-10-03
Supplement: oncotarget-08-90706-s001.pdf [file oncotarget-08-90706-s001.pdf]

# Low expression of SerpinB2 is associated with reduced survival in lung adenocarcinomas

## SUPPLEMENTARY MATERIALS

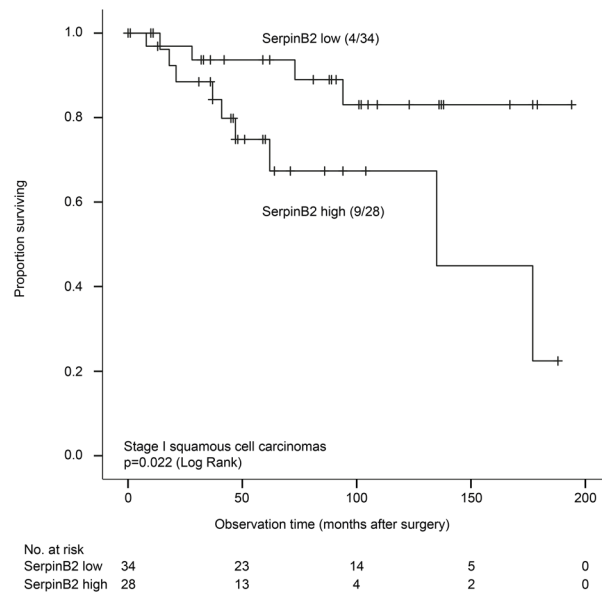

**Supplementary Figure 1: Lung cancer specific survival for stage I squamous cell carcinomas (n=62) according to low and high expression of SerpinB2 (Kaplan-Meier).** Numbers in brackets indicate events and total number of cases in each group.

For Supplementary Tables, see Supplementary Tables files
